# Supplementary material for: Genome-Wide SNP Genotyping to Infer the Effects on Gene Functions in Tomato
Source: PubMed Central journal article supplement — DNA Res. 2013 Mar 12;20(3):221–33. doi: 10.1093/dnares/dst005 (PMC3686429; doi:10.1093/dnares/dst005), 2013-03-12

Chr01

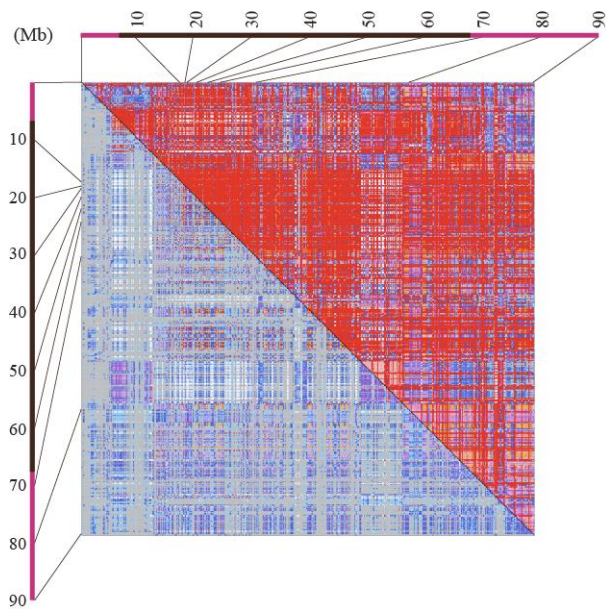

Chr02

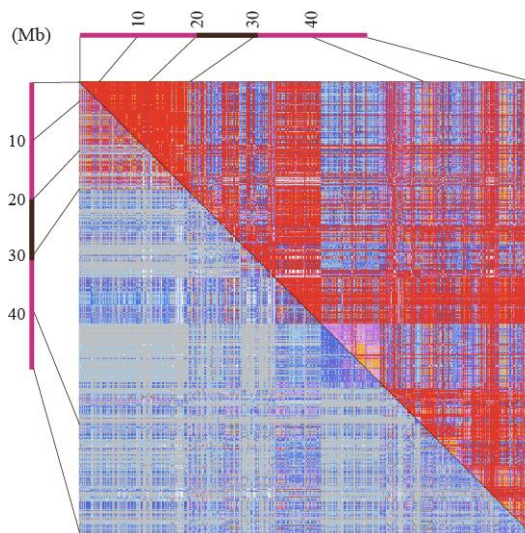

Chr03

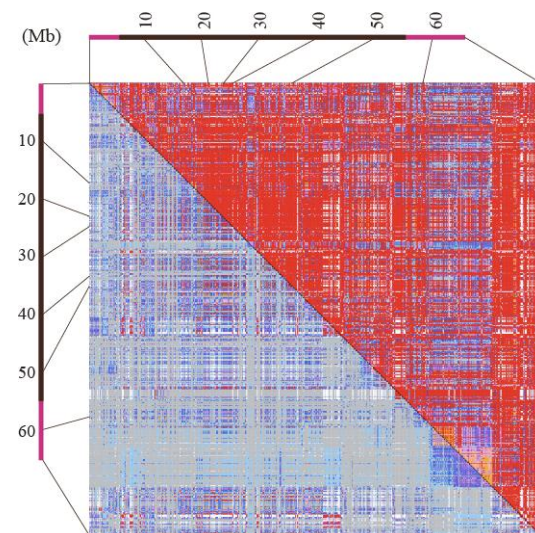

Chr04

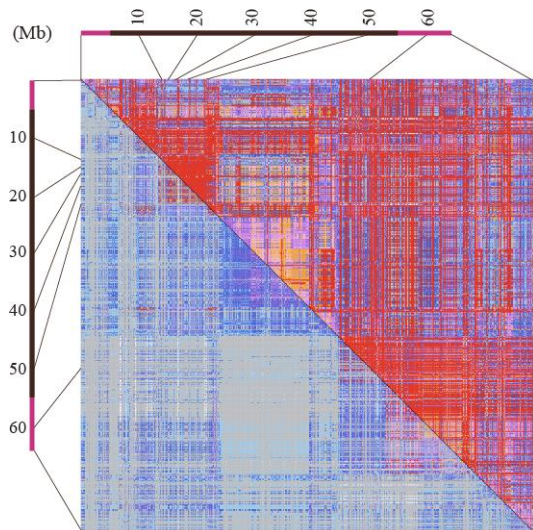

Chr05

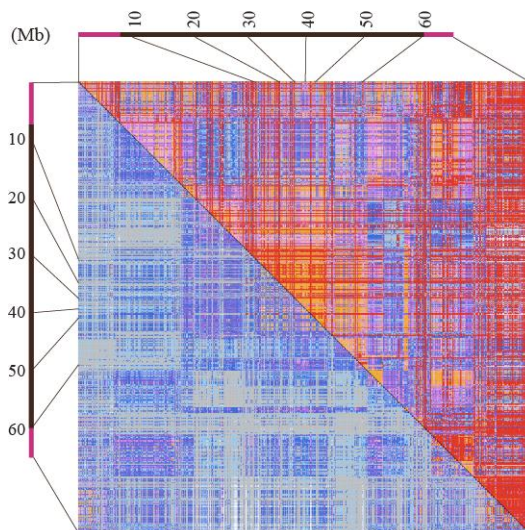

Chr06

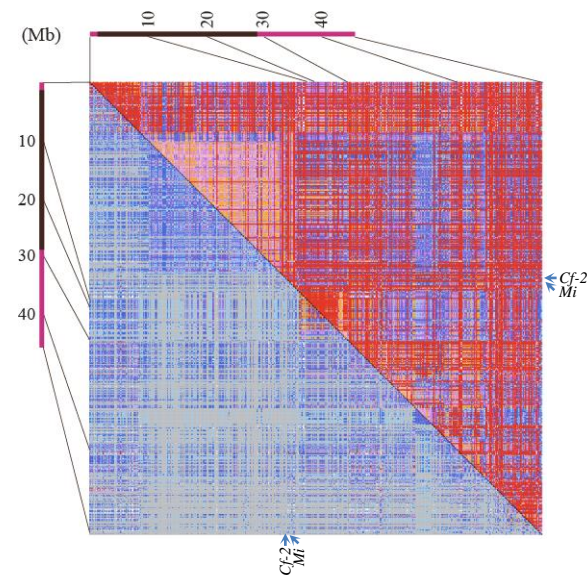

40 tomato lines

Chr07

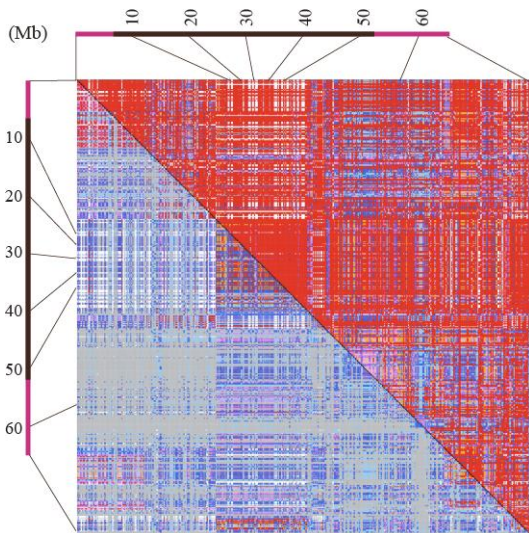

Chr08

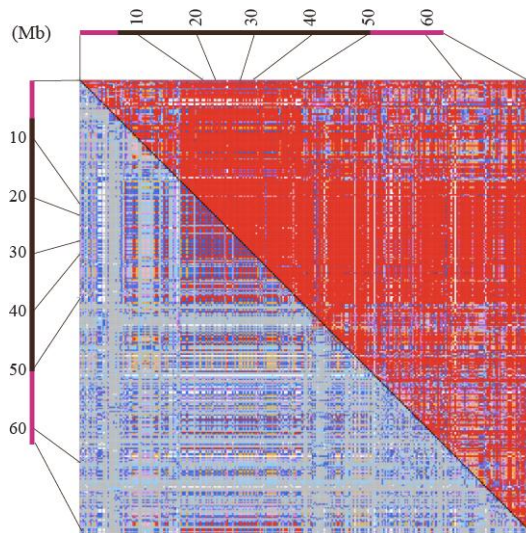

Chr09

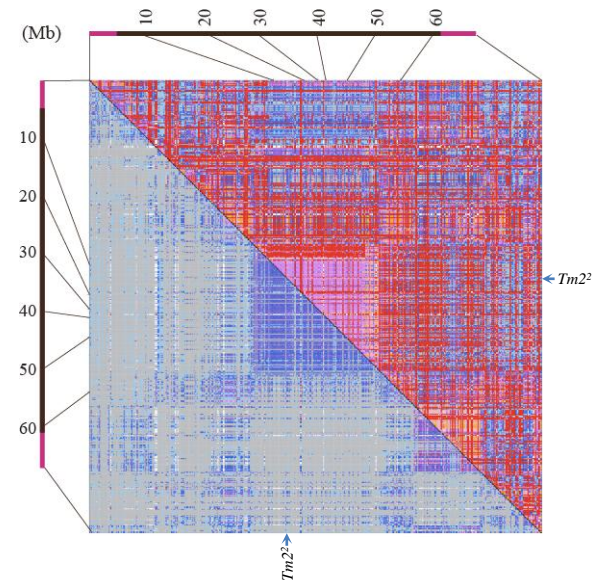

Chr10

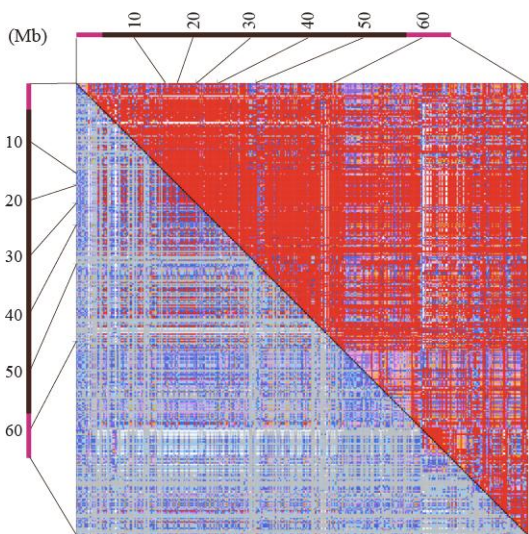

Chr11

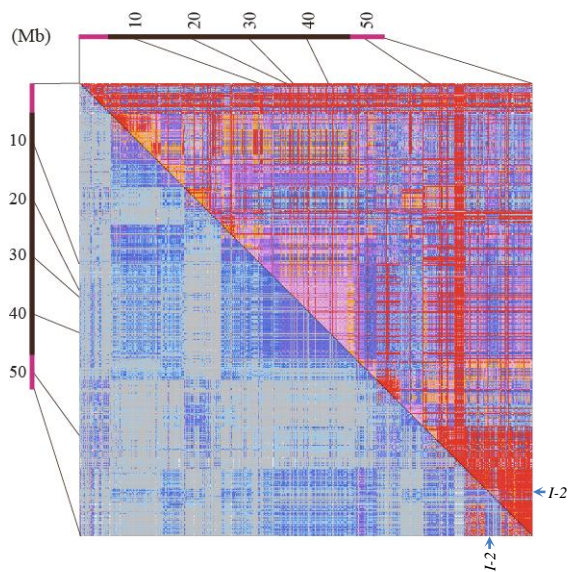

Chr12

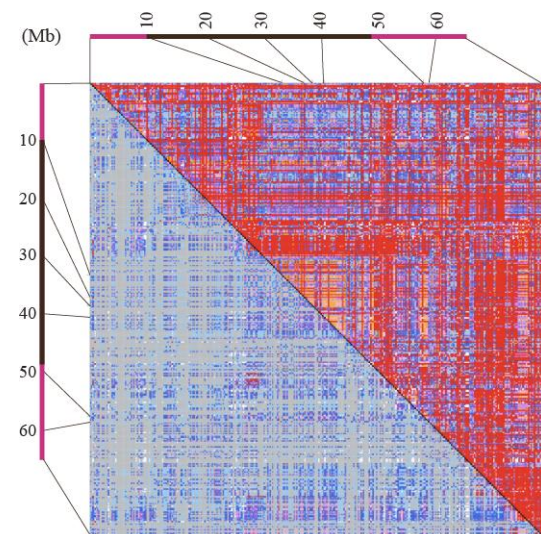

40 tomato lines

### Chr01

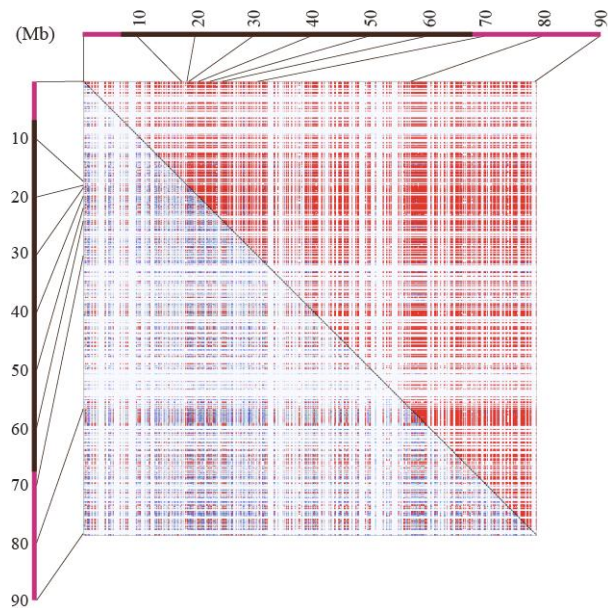

### Chr02

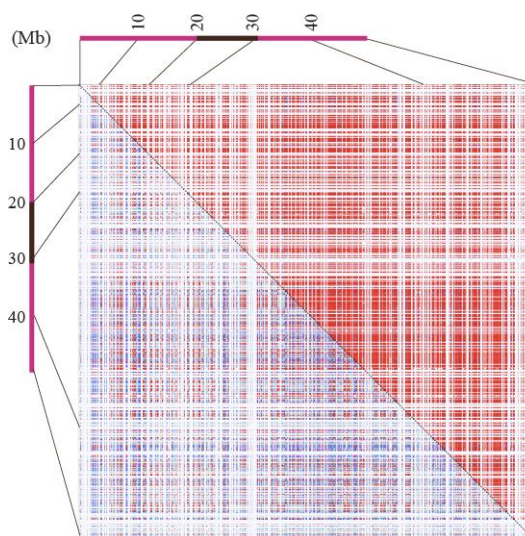

### Chr03

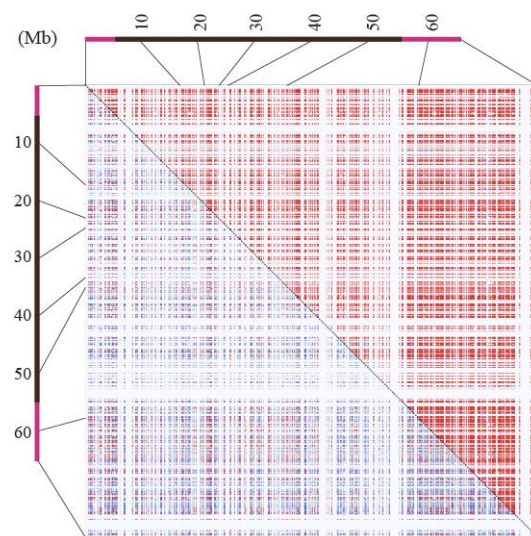

### Chr04

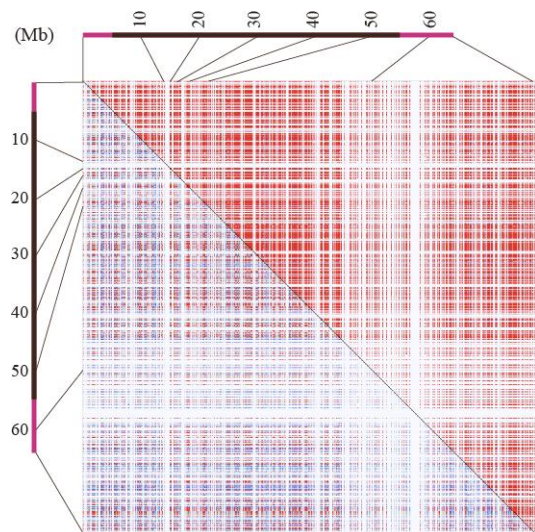

### Chr05

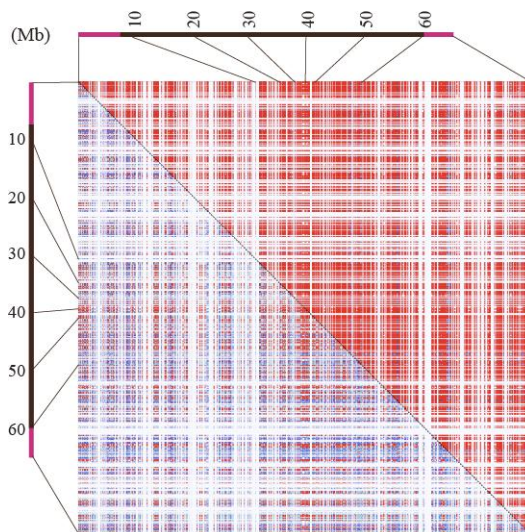

### Chr06

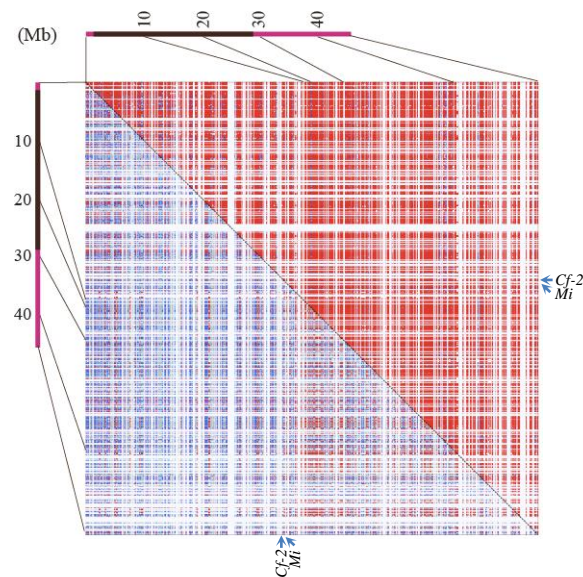

Cluster 1 (wild relatives)

**Chr07**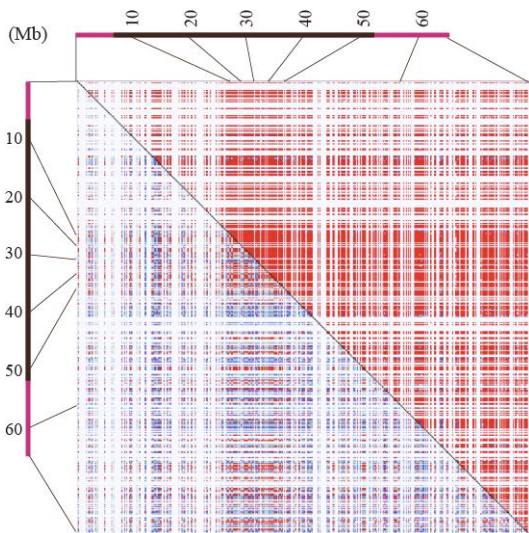**Chr08**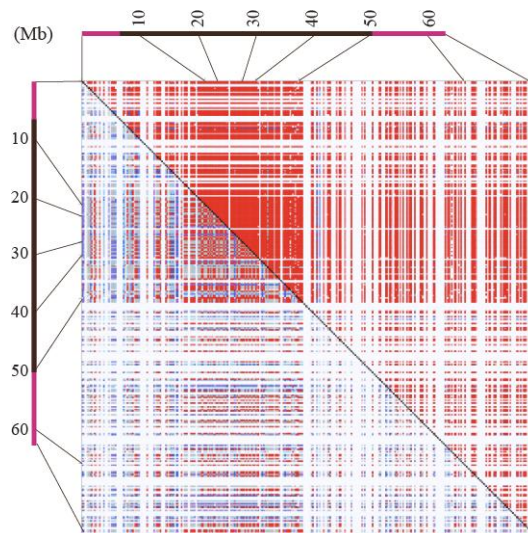**Chr09**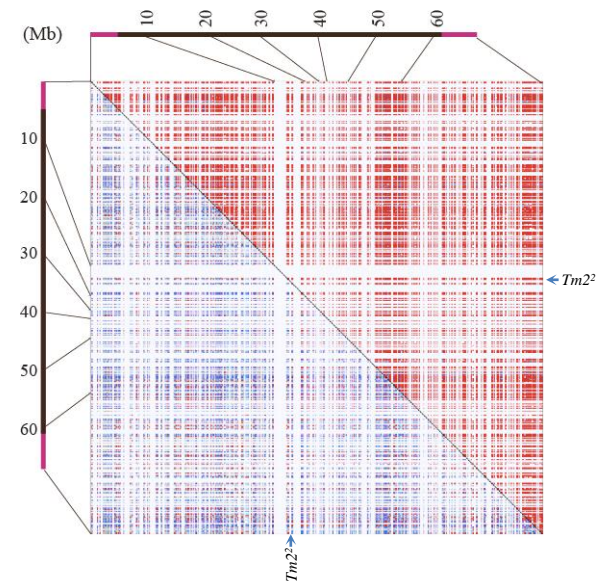**Chr10**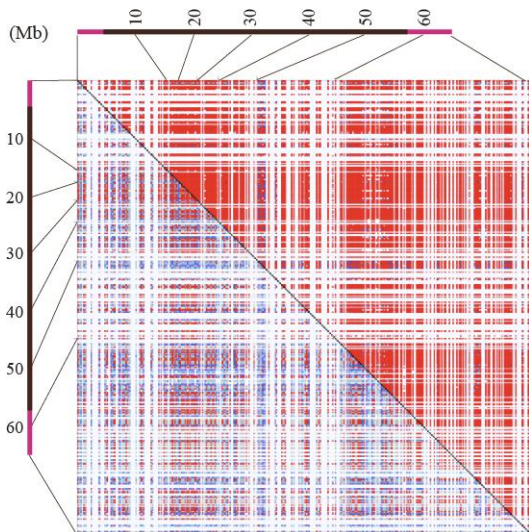**Chr11**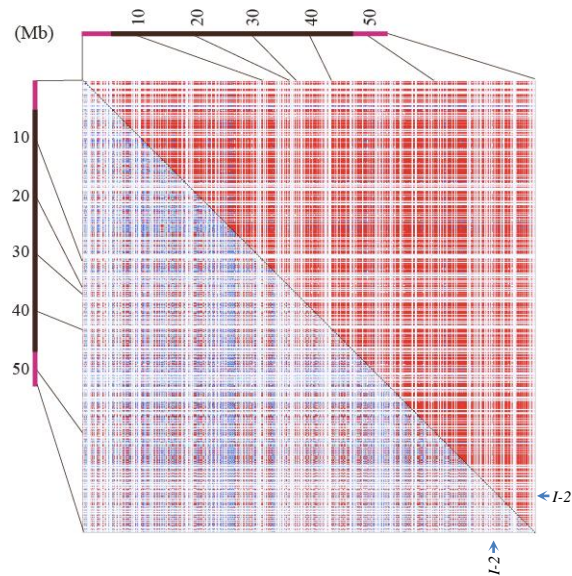**Chr12**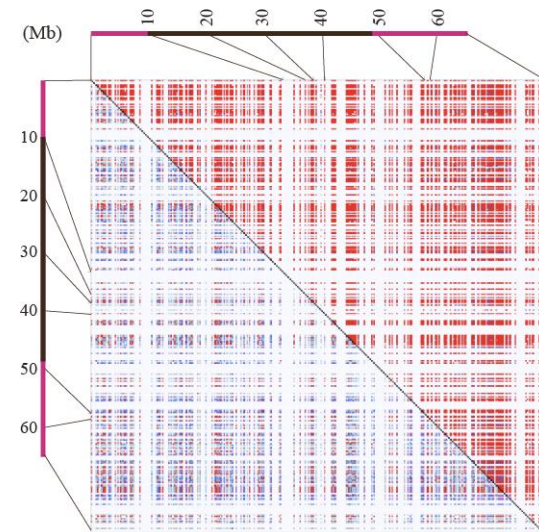

Cluster 1 (wild relatives)

### Chr01

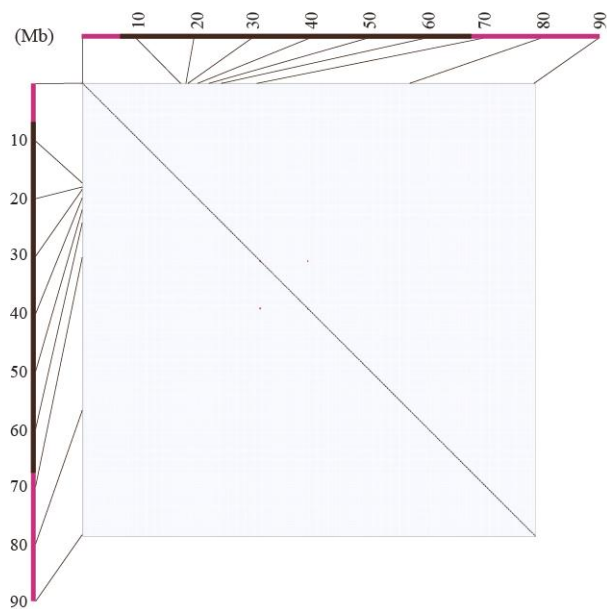

### Chr02

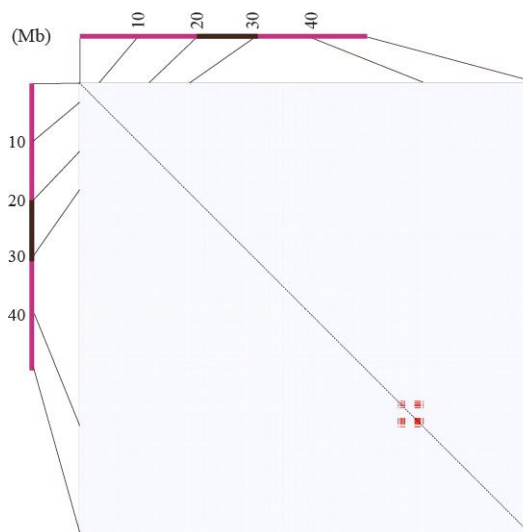

### Chr03

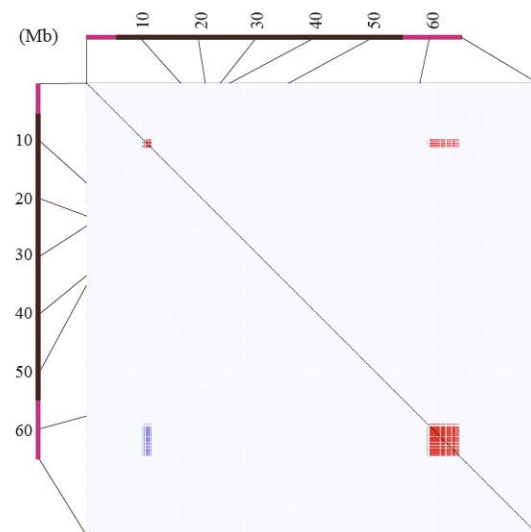

### Chr04

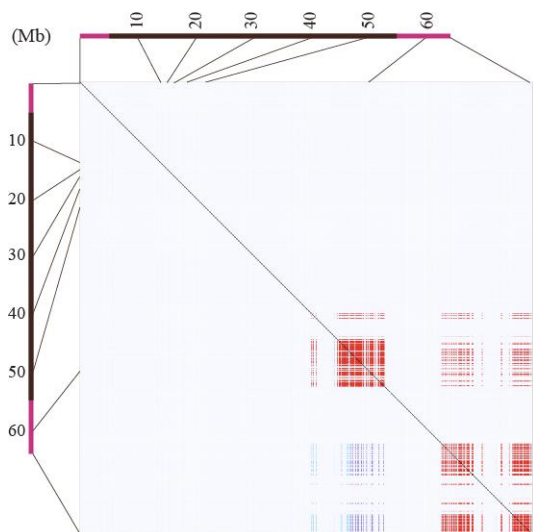

### Chr05

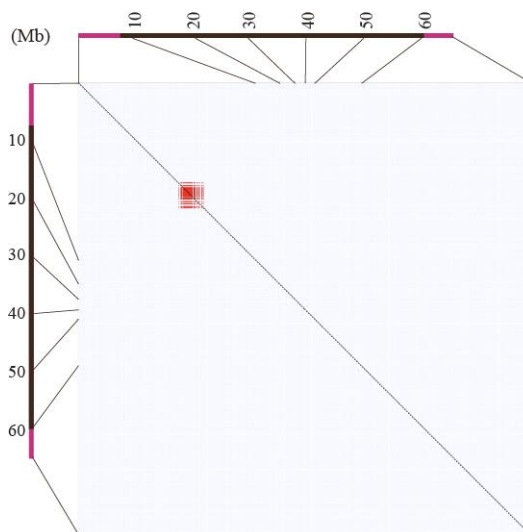

### Chr06

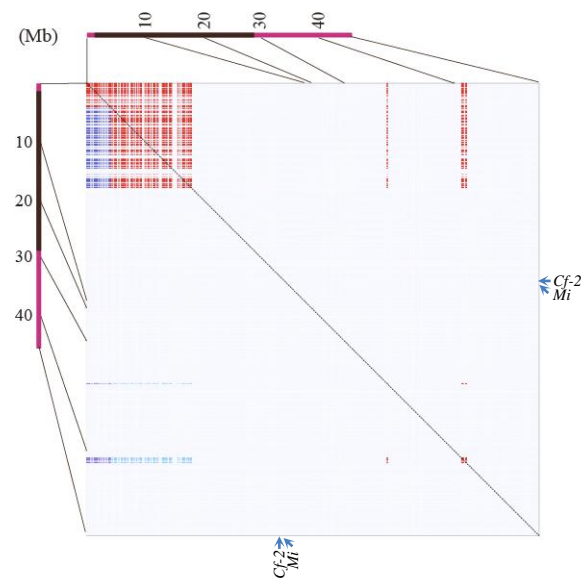

Cluster 2 (Micro-Tom)

**Chr07**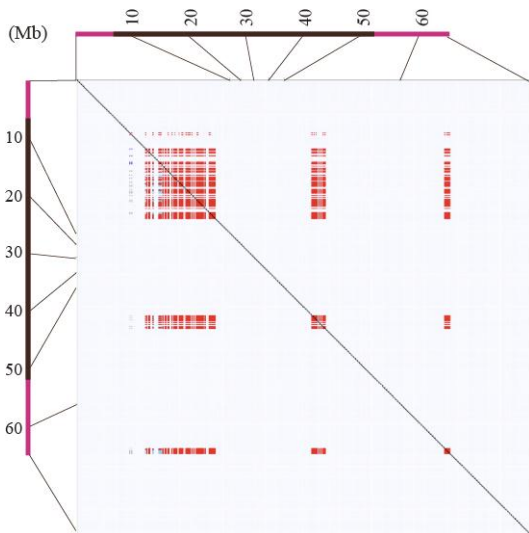**Chr08**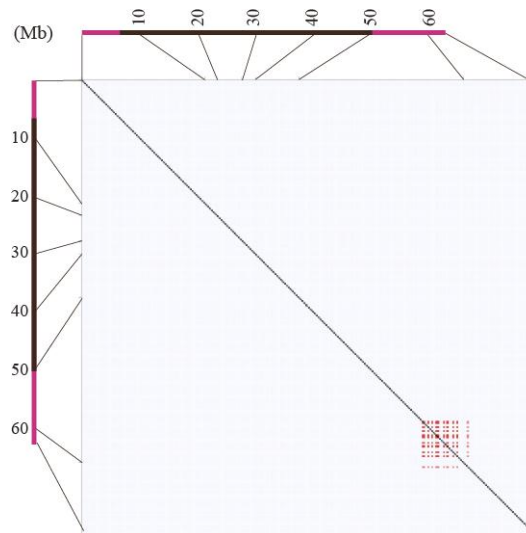**Chr09**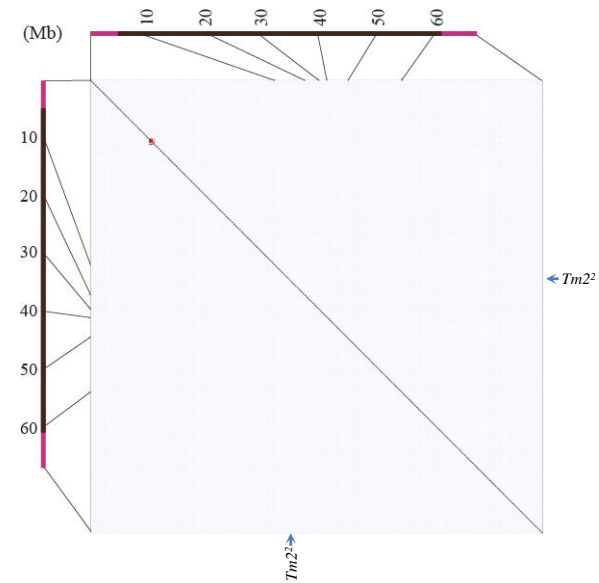**Chr10**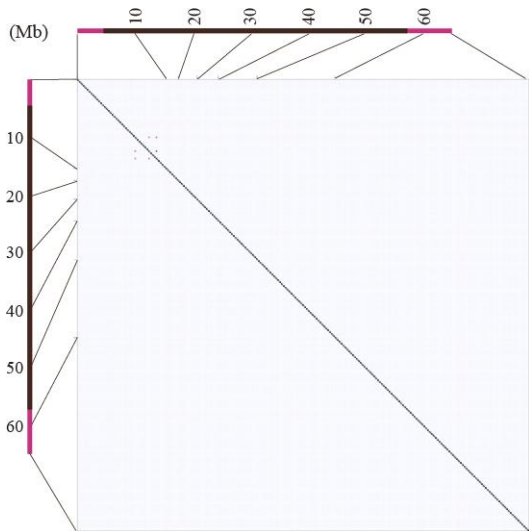**Chr11**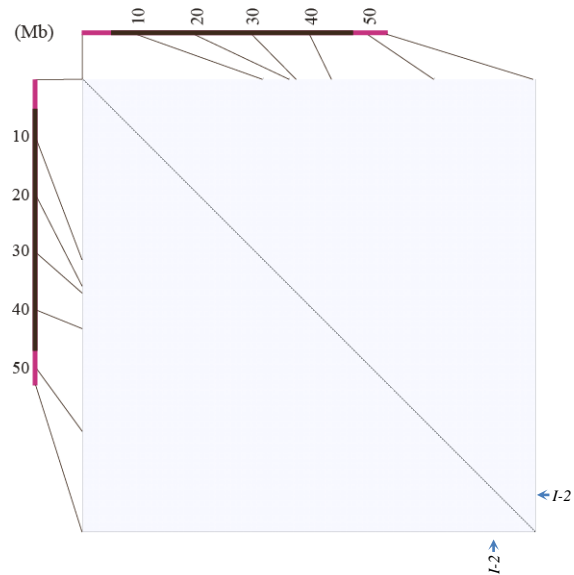**Chr12**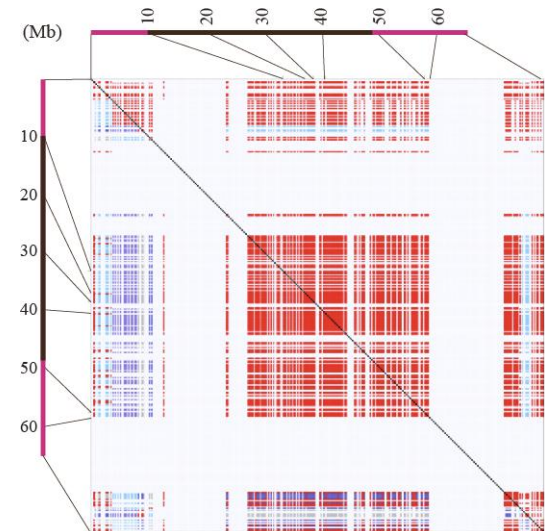

Cluster 2 (Micro-Tom)

### Chr01

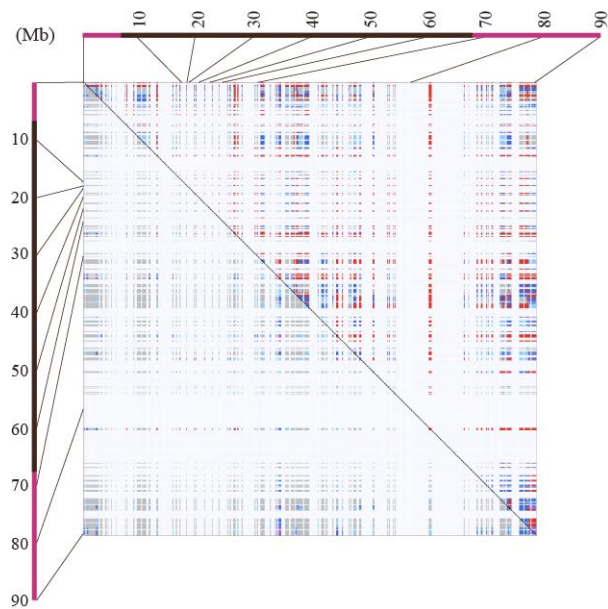

### Chr02

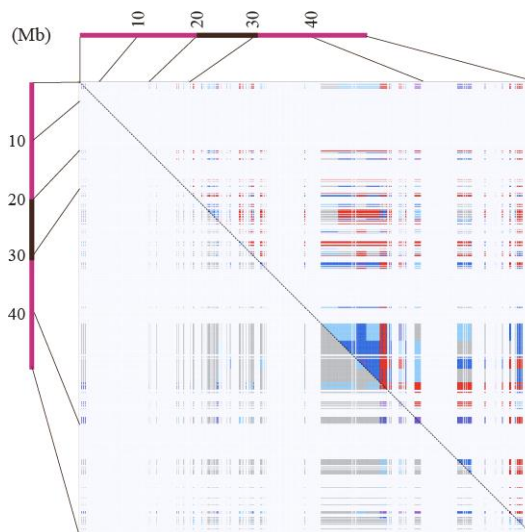

### Chr03

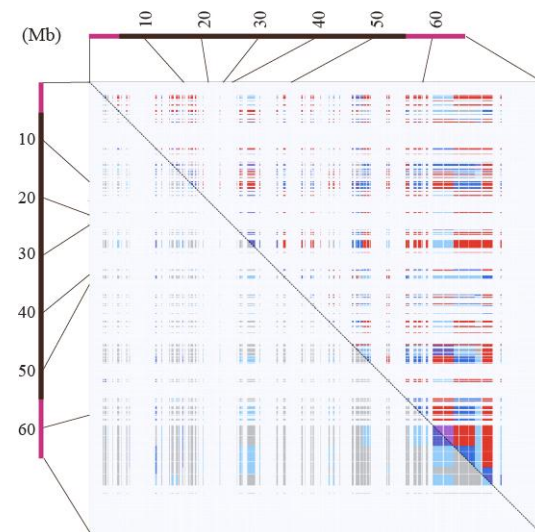

### Chr04

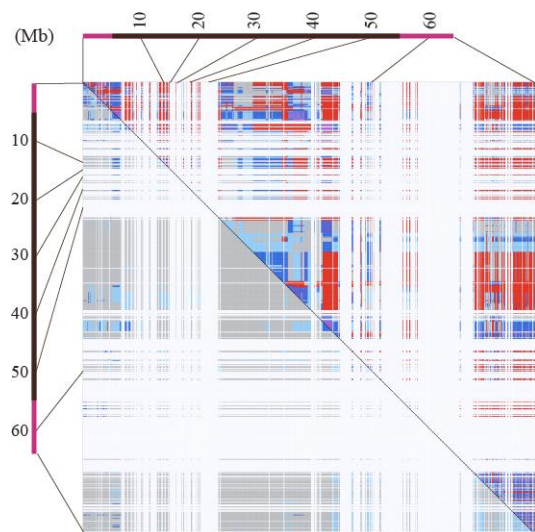

### Chr05

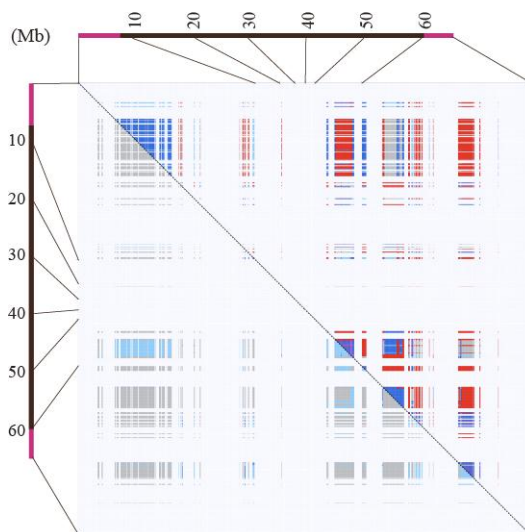

### Chr06

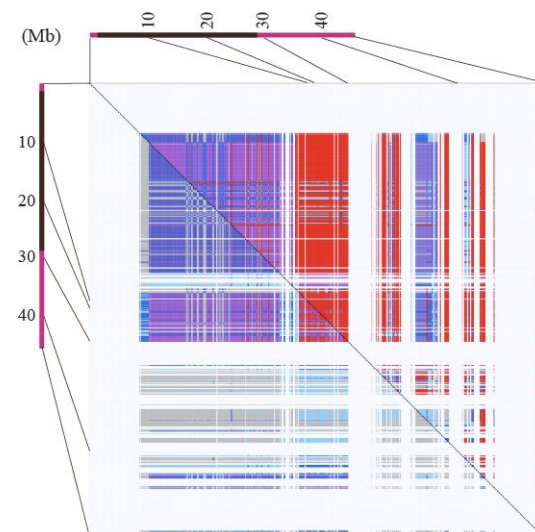

Cluster 3 (F<sub>1</sub> hybrids)

### Chr07

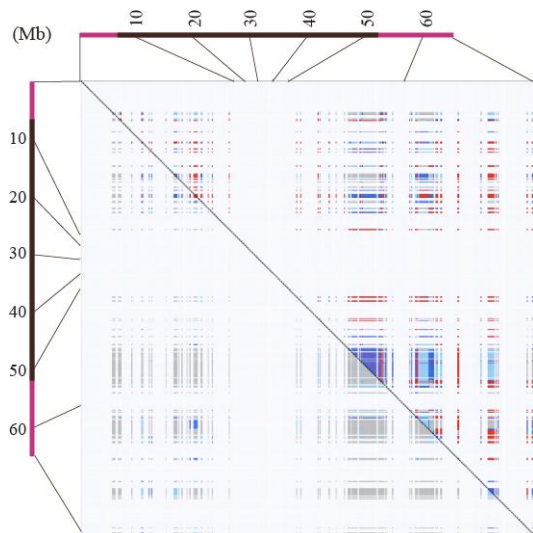

### Chr08

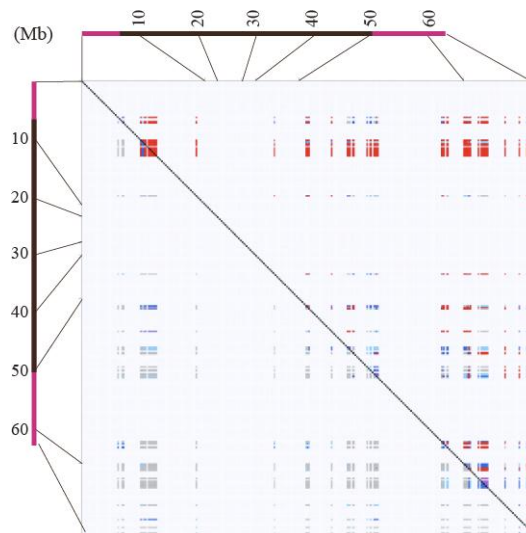

### Chr09

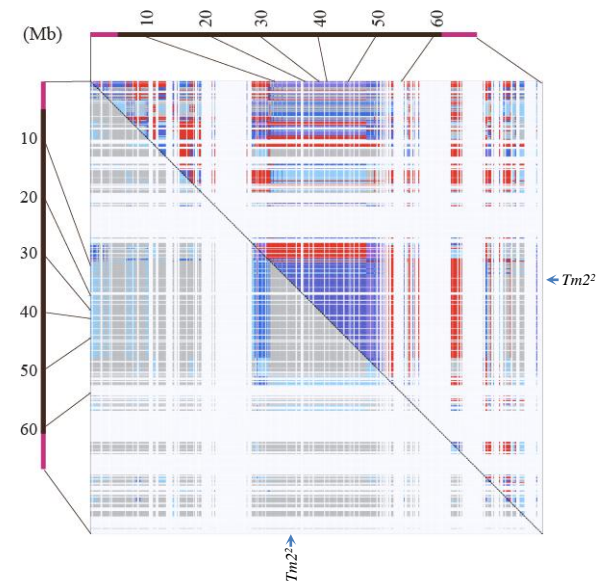

### Chr10

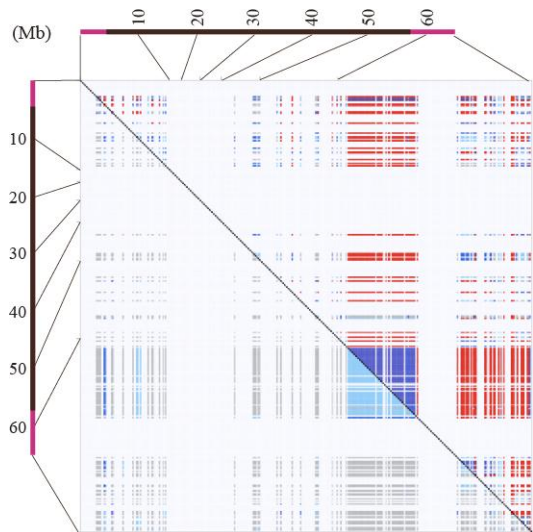

### Chr11

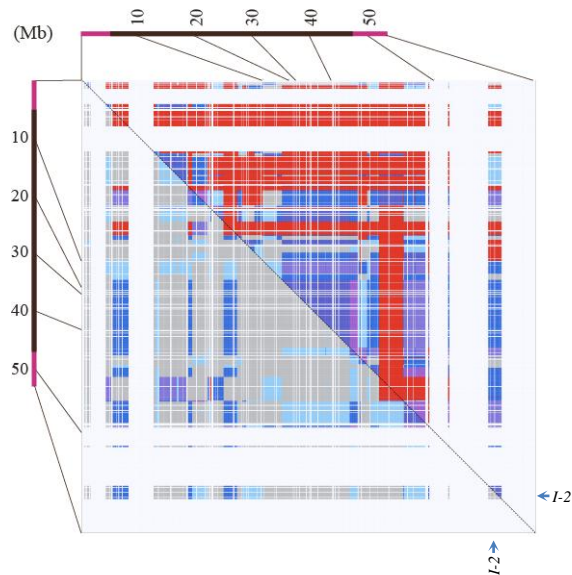

### Chr12

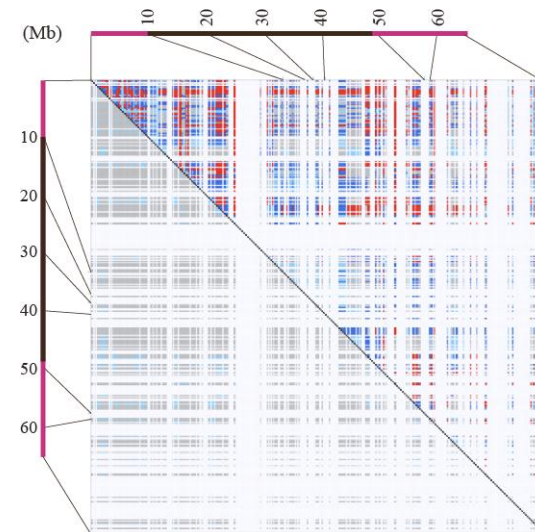

Cluster 3 (F<sub>1</sub> hybrids)



### Chr01

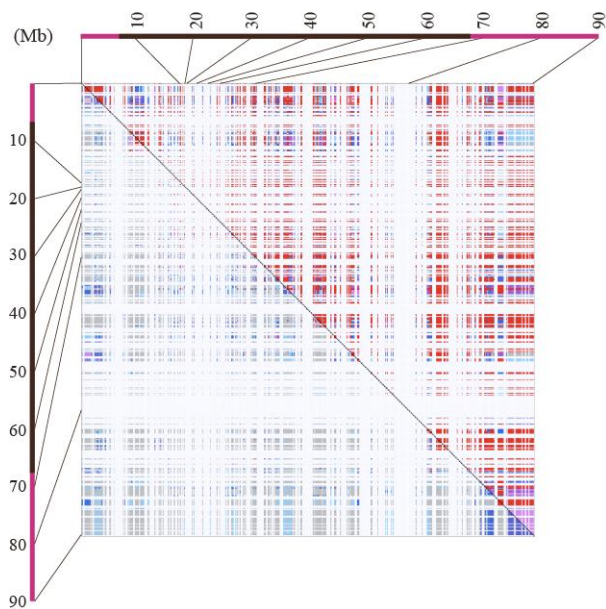

### Chr02

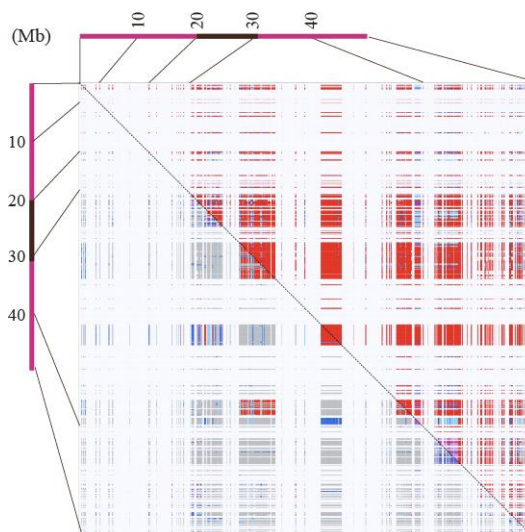

### Chr03

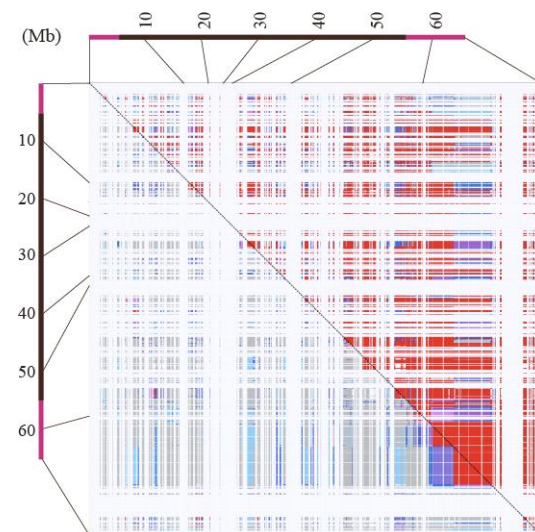

### Chr04

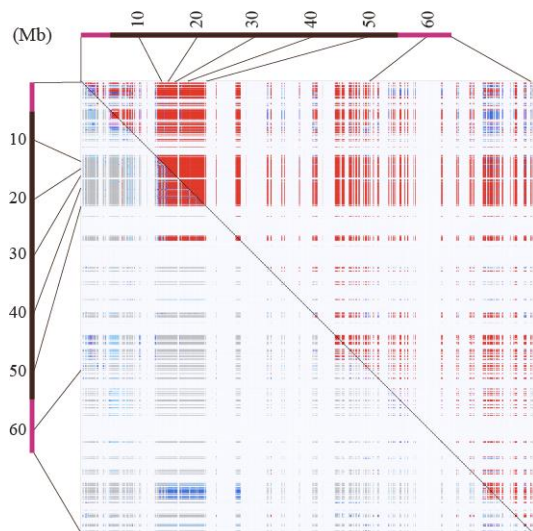

### Chr05

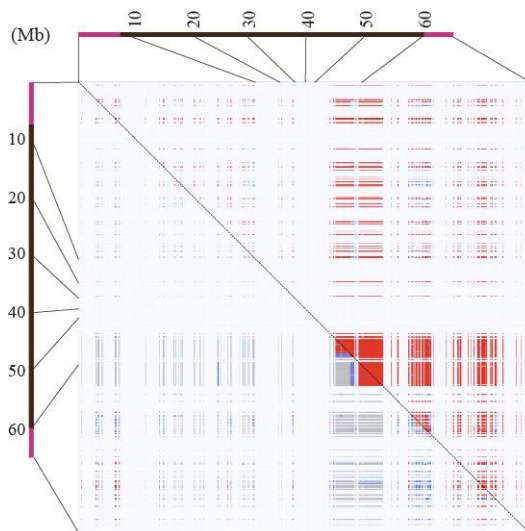

### Chr06

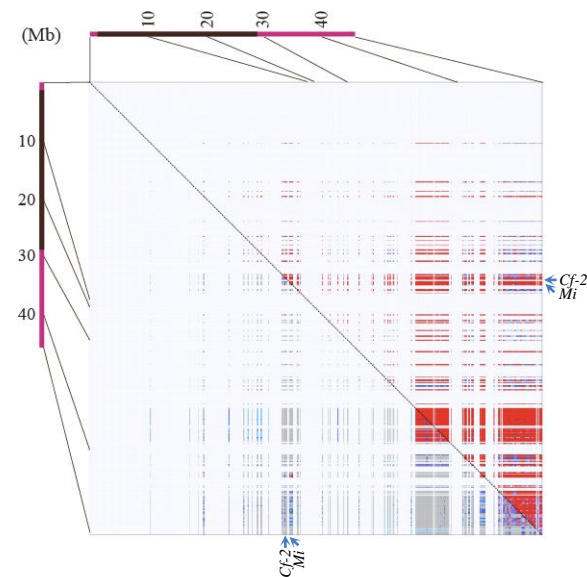

Cluster 4 (inbred lines)

### Chr07

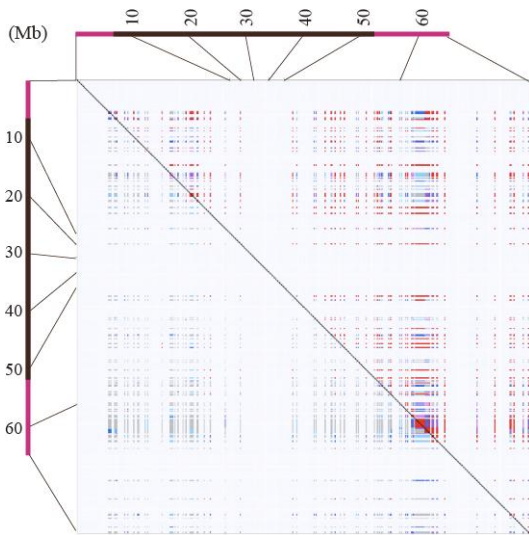

### Chr08

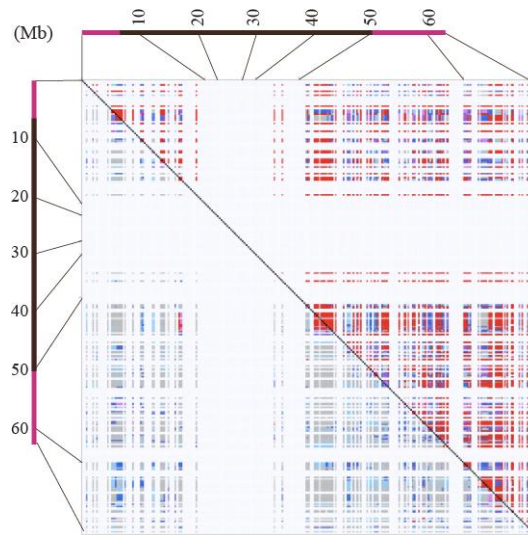

### Chr09

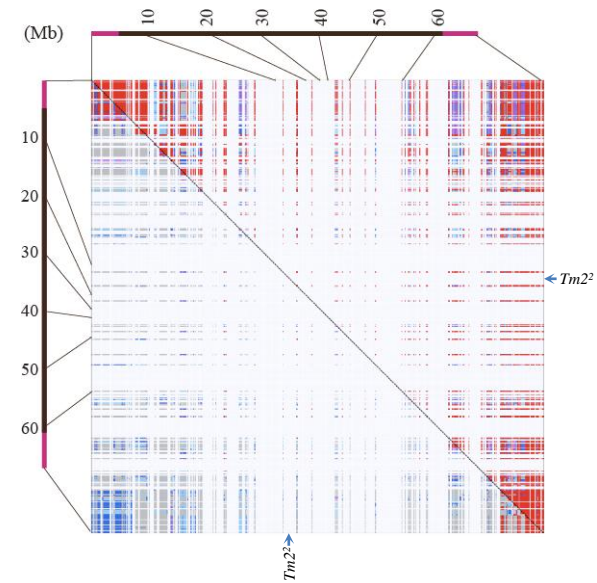

### Chr10

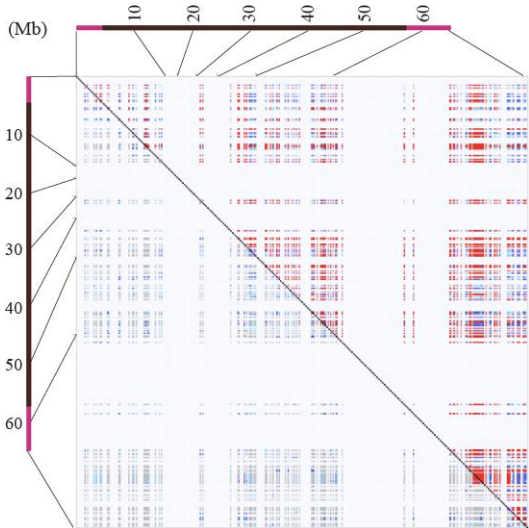

### Chr11

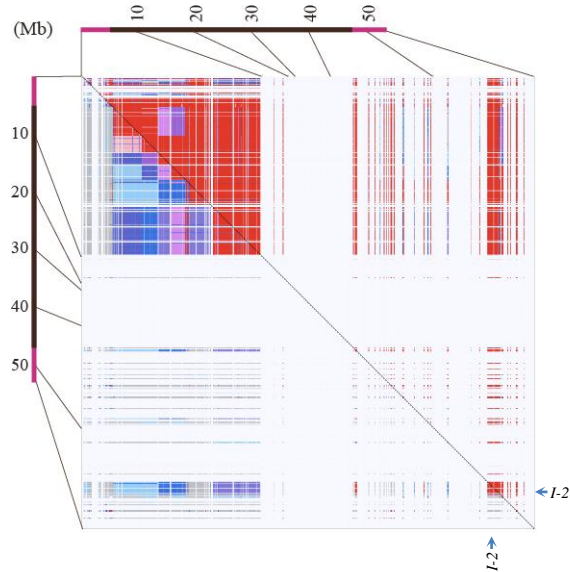

### Chr12

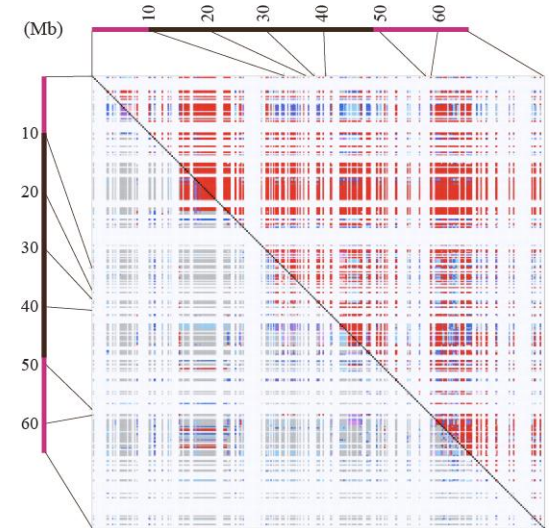

Cluster 4 (inbred lines)

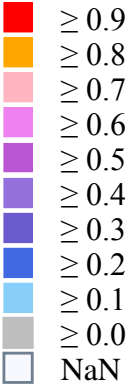

Supplement: supp_dst005_dst005supp_fig2.pdf [file supp_dst005_dst005supp_fig2.pdf]
