# Supplementary figures and images for: Genome-Wide SNP Genotyping to Infer the Effects on Gene Functions in Tomato
Source: PubMed Central journal article supplement — DNA Res. 2013 Mar 12;20(3):221–33. doi: 10.1093/dnares/dst005 (PMC3686429; doi:10.1093/dnares/dst005), 2013-03-12

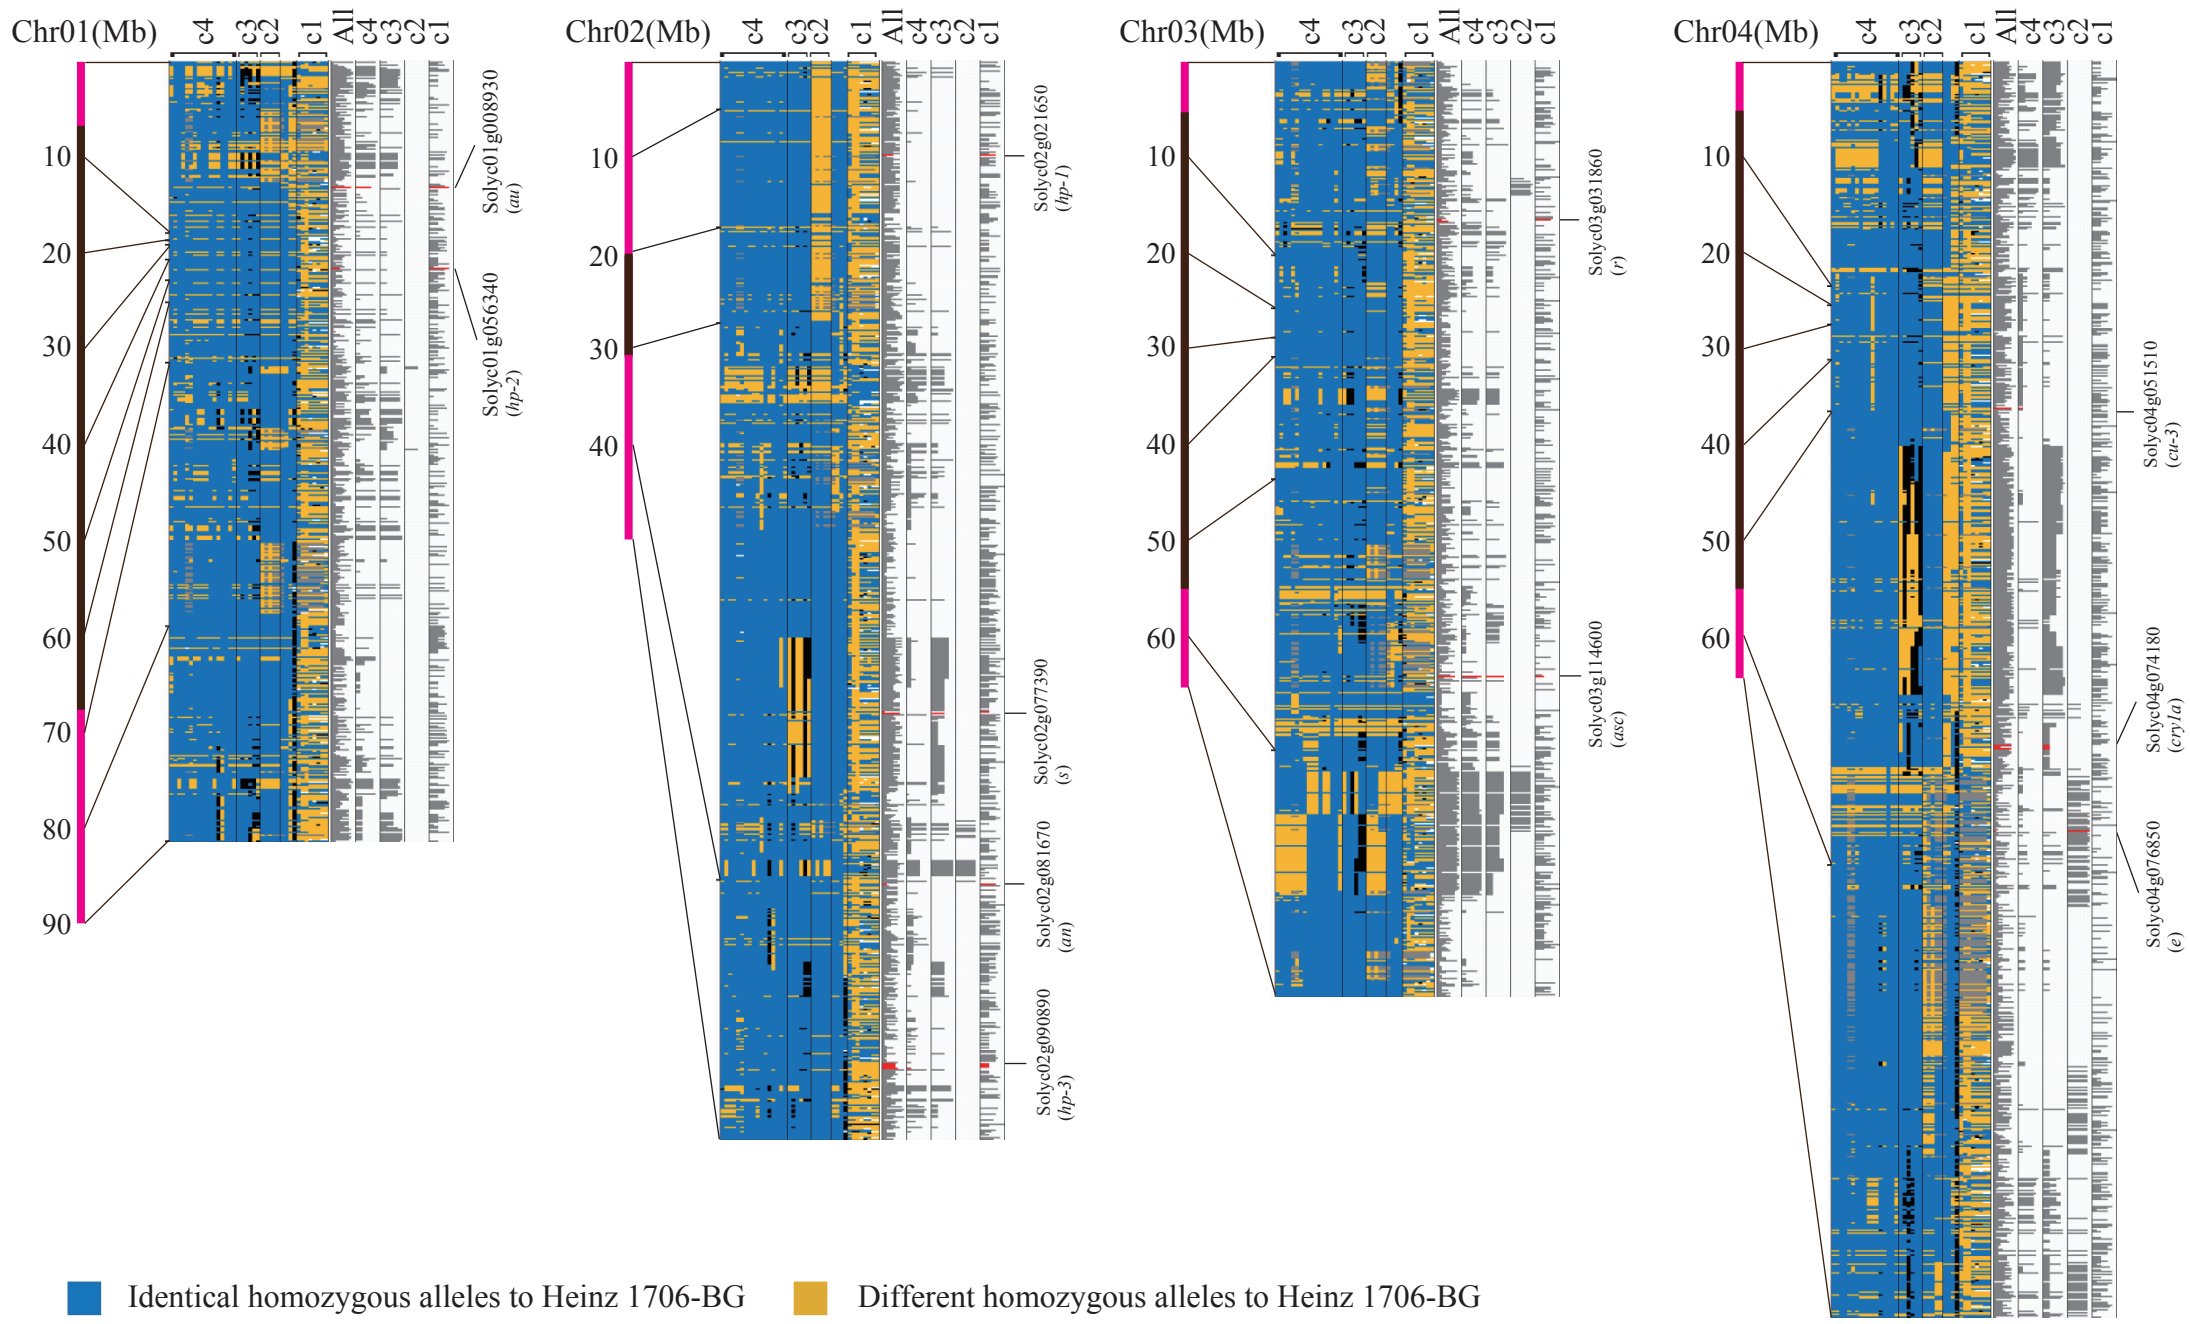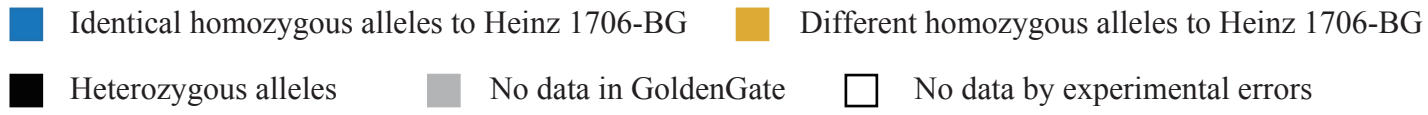

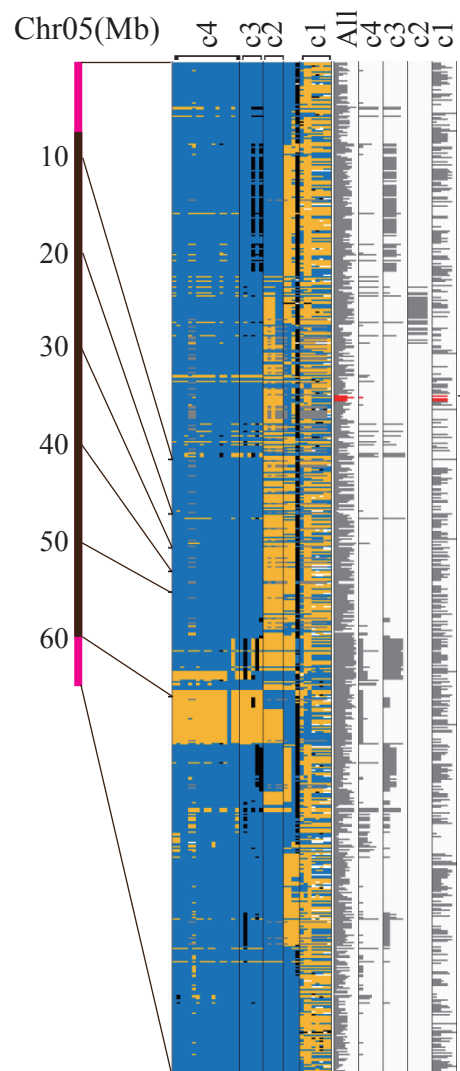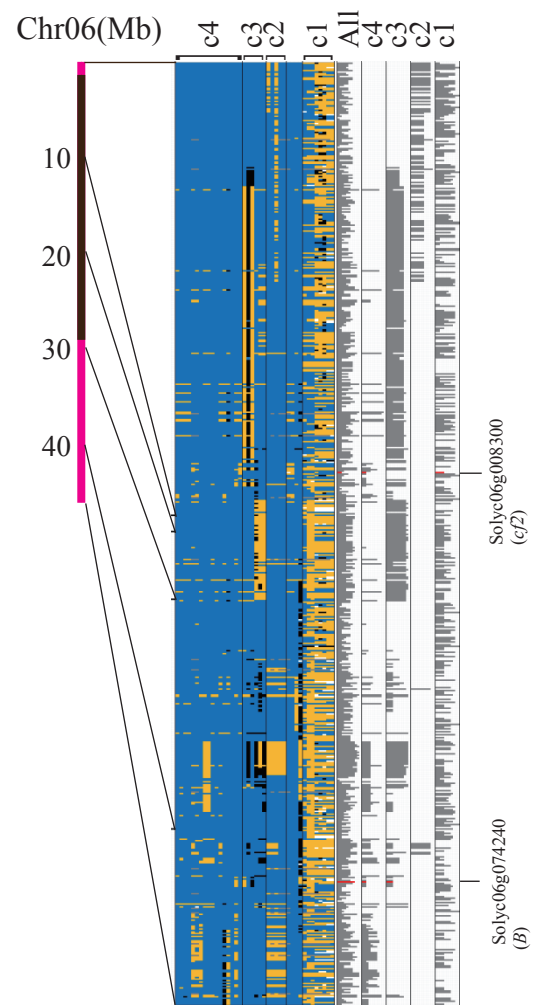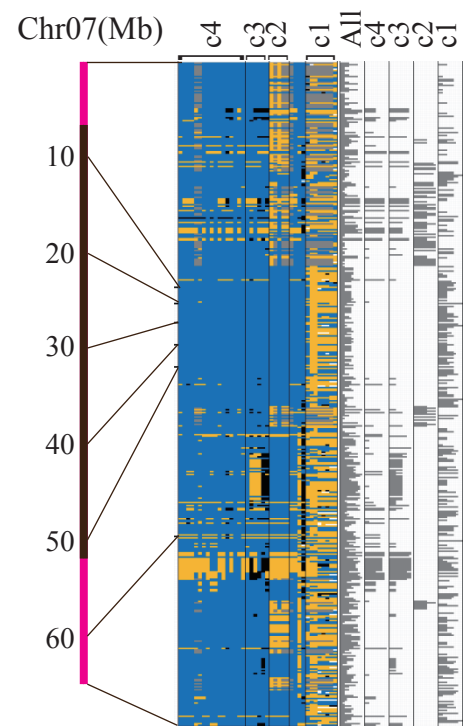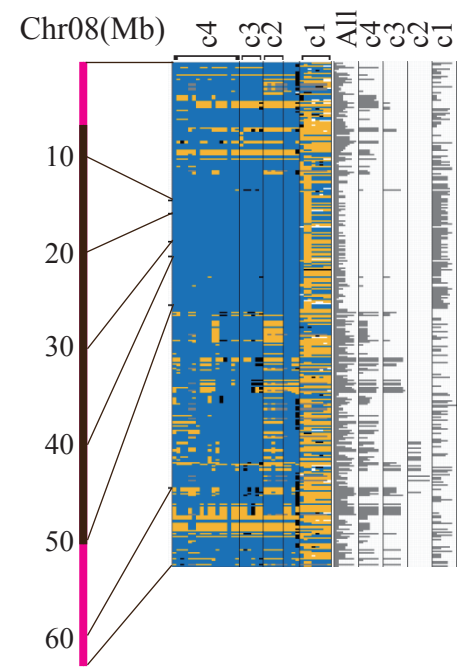

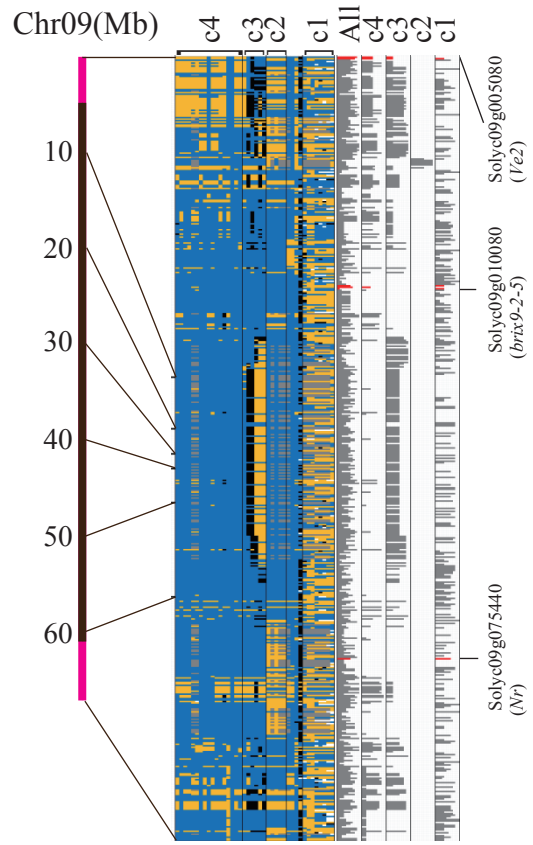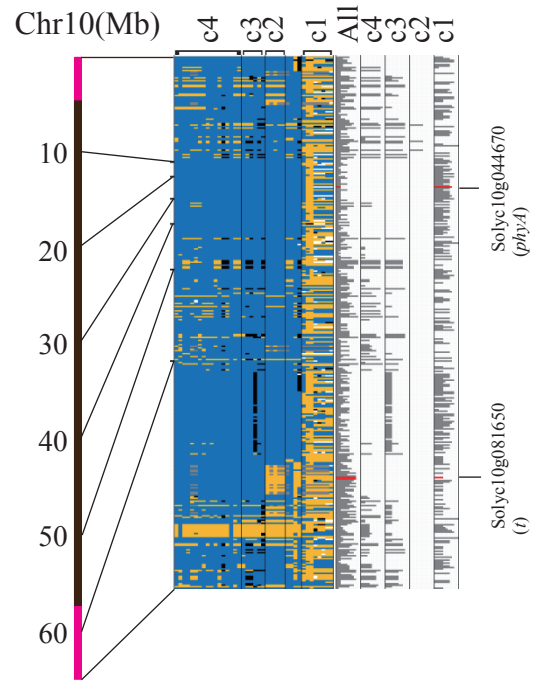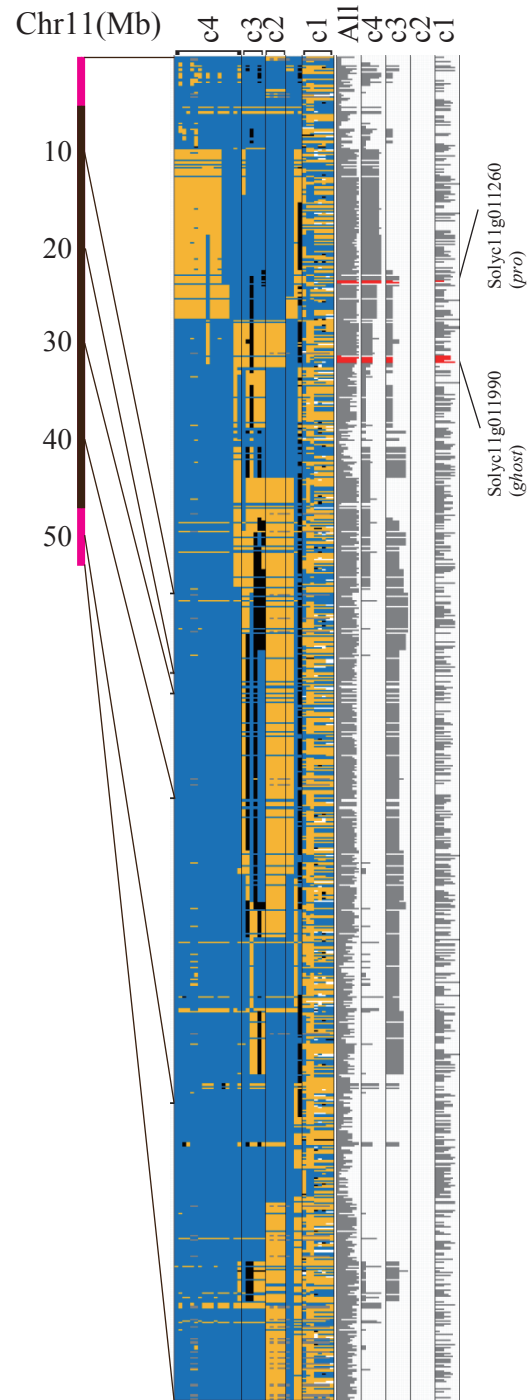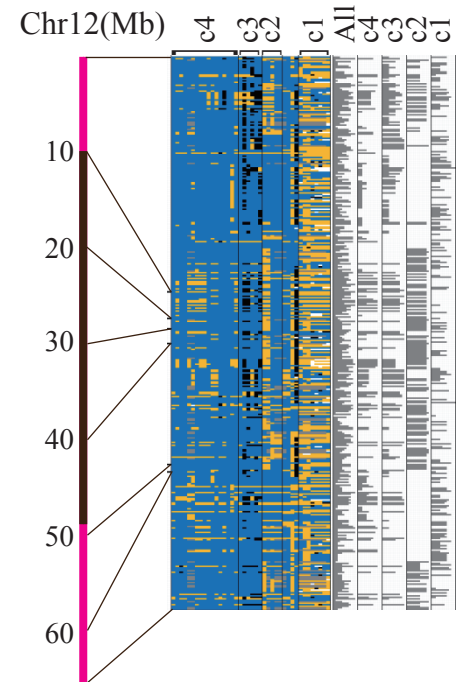

Supplement: supp_dst005_dst005supp_fig1.pdf [file supp_dst005_dst005supp_fig1.pdf]
